# Supplementary material for: UV-C treatment promotes quality of early ripening apple fruit by regulating malate metabolizing genes during postharvest storage
Source: PubMed Central journal article supplement (PMC6467447; doi:10.1371/journal.pone.0215472), 2019-04-16
Supplement: pone.0215472.s001.pdf [file pone.0215472.s001.pdf]

**S1 Table. Primers used for qRT-PCR analysis.**

| Genes            | Forward primer            | Reversed primer          |
|------------------|---------------------------|--------------------------|
| <i>MdActin</i>   | TGACCGAATGAGCAAGGAAATTACT | TACTCAGCTTTGGCAATCCACATC |
| <i>MdNAD-MDH</i> | CTTAGATGCTCTTGGCCTTTCC    | TCAGCTGCTTTTCTCACACATTG  |
| <i>MdNADP-ME</i> | GTACAGCCCTTCCTATCGAAGTTT  | TCTTGAACCCGGTACAACCAA    |
| <i>MdPEPCK</i>   | CTTCGAGGTGTTTCATGAATCACA  | TTGATCGGTTACATGACATGG    |
| <i>MdPEPC</i>    | CGAGAGACGGGTTGTGTCC       | TGCACAGCAATCTGATCACAG    |
